# Supplementary material for: Unveiling a catalytically promiscuous feruloyl esterase from Clostridium acetobutylicum
Source: Research Square preprint supplement (doi:10.21203/rs.3.rs-7712209/v1), 2025-11-28
Supplement: Supplementary file 1 [file 60d616f68fbf44c1b543a15d.docx]

**Supplementary material**

**Unveiling a catalytically promiscuous feruloyl esterase from *Clostridium acetobutylicum***

**Shang Li1 · Xiaowang Hu1 · Xinyu Che1 · Liang Quan1 · Xianglong Li1 ·**

**Ting Feng1 · Yanbin Feng 1# · Song Xue1#**

1 MOE Key Laboratory of Bio-Intelligent Manufacturing, School of Bioengineering, Dalian University of Technology, Dalian, Liaoning, China

**#**Corresponding Author: xuesong@dlut.edu.cn, afyb@dlut.edu.cn

**Contents**

Fig. S1. Molecular analysis of CaFAE wild-type and mutant constructs.

Fig. S2. Multiple sequence alignment of CaFAE with other feruloyl esterases.

Table S1. Primers used in this study for mutagenesis.

Table S2. Data-collection and refinement statistics for CaFAE.

Table S3. Specific activity of the enzymes on methyl ferulate.


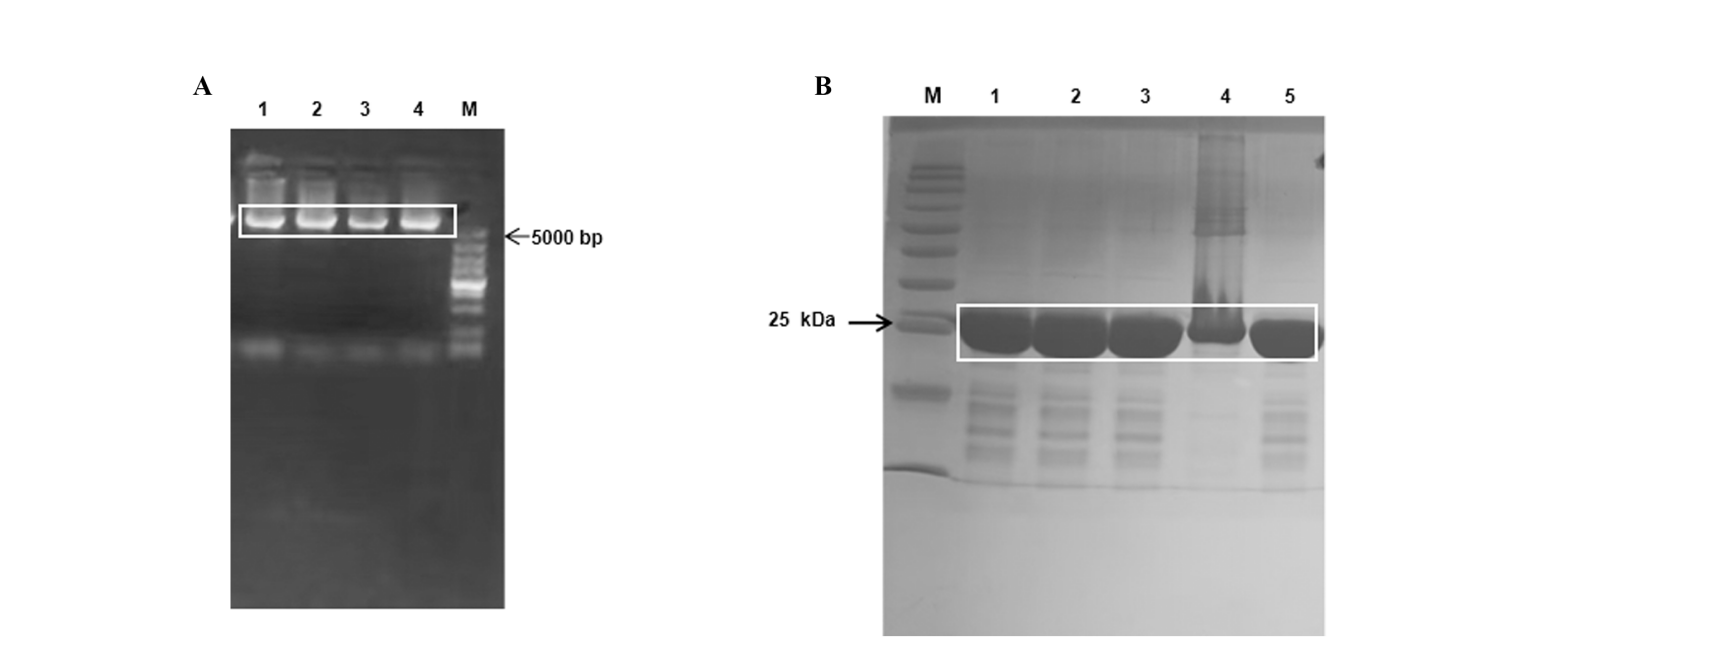


**Fig. S1.** Molecular analysis of CaFAE wild-type and mutant constructs. (A) Full-plasmid PCR amplification verified by agarose gel electrophoresis. Lane M, DNA marker; lanes 1-4 correspond to the Y151G, Y151V, E168G, and E168R mutants, respectively. (B) SDS-PAGE (12.5%) analysis of the purified proteins. Following expression and purification by gel filtration chromatography, samples of wild-type CaFAE (lane 1) and its mutants (lanes 2-5: Y151G, Y151V, E168G, E168R) were analyzed. Lane M, protein molecular weight marker.

**
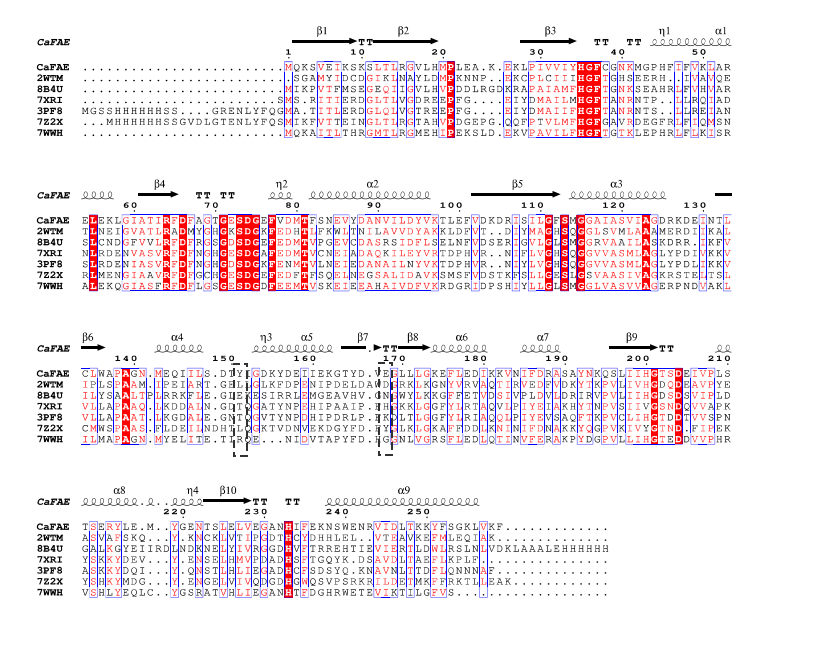
**

**Fig. S2.** Multiple sequence alignment of CaFAE with other feruloyl esterases. The alignment includes CaFAE and homologous enzymes with their respective PDB accession numbers: Est1E (2WTM), PET46 (8B4U), LaFAE (7XRI), Lj0536 (3PF8), LbFAE (7Z2X) and GthFAE (7WWH). Sequence alignment was performed using Clustal X v2.0 and visualized with the ESPript server. Key residues Y151 and E168 are highlighted in boxes.

**Table S1.** Primers used in this study for mutagenesis.

| Primer Name | Nucleotide Sequence (5'–3'） |
| --- | --- |
| Y151G_Forward | CTGAGCGATACCGGTATTGGCGATAAA |
| Y151G_Reverse | TTTATCGCCAATACCGGTATCGCTCAG |
| Y151V_Forward | CTGAGCGATACCGTGATTGGCGATAAA |
| Y151V_Reverse | TTTATCGCCAATCACGGTATCGCTCAG |
| Y168G_Forward | ACCTATGATGTGGGTGGCCTGTTACTG |
| Y168G_Reverse | CAGTAACAGGCCACCCACATCATAGGT |
| Y168R_Forward | ACCTATGATGTGCGTGGCCTGTTACTG |
| Y168R_Reverse | CAGTAACAGGCCACGCACATCATAGGT |

**Table S2.** Data-collection and refinement statistcs for CaFAE.

| Data Set | CaFAE |
| --- | --- |
| PDB code | 9W30 |
| Data collection |  |
| Space group | *P*41 |
| Unit-cell parameters (Å,o) | a=69.26, b=69.26,  c=213.12  α=90, β=90, γ=90 |
| Molecules in asymmetric unit | 4 |
| Wavelength (Å)  Total reflections  Unique reflections | 0.9793  348742 (33240)  36468 (3575) |
| Resolution (Å)  Rsym† (%) | 30.97-2.45 (2.54-2.45)  12.88 (41.07) |
| Mean I/σ | 16.57 (4.81) |
| CC1/2 | 0.988 (0.969) |
| CC* | 0.997 (0.992) |
| Completeness (%) | 98.34 (97.32) |
| Multiplicity  Wilson B-factor  Refinement | 9.6 (9.2)  39.21 |
| Rwork ‡ (%)  Rfree § (%) | 20.28 (25.98)  25.64 (27.84) |
| No of atoms  Protein  Water  R.m.s.d  Bond lengths(Å)  Bond angles(o)  Ramachandran (%)  Favored  Allowed  Outliers  Clashscore  Average B-factor (Å2)  Protein  Water | 8274  8129  145  0.002  0.49  95.39  4.51  0.10  5.22  43.73  43.73  43.94 |

*Values in parentheses are for the highest resolution shell.

†Rsym = Σ|I-<I>|/Σ<I>, where I is the observed intensity, and <I> is the average intensity of multiple observations of symmetry related reflections.

‡ Rwork= Σhkl||Fobs|-|Fcalc||/Σhkl|Fobs|, § Rfree is calculated from 5% of the reflections excluded from refinement.

**Table S3.** Specific activity of enzymes on methyl ferulate (mU/mg).

| Substrate | CaFAE | AnFae1 | AoFae1 | McFae1 |
| --- | --- | --- | --- | --- |
| Methyl ferulate | 64.00 | 139.15a | 200.60a | 21533.33a |

An enzyme activity unit (U) is defined as the amount of product released by 1 mg of purified enzyme per minute under certain conditions. a Specific activity is calculated from a previous report (Lin et al. 2023).
